# Supplementary material for: Frequency-dependent stimulated and post-stimulated voltage control of magnetism in transition metal nitrides: towards brain-inspired magneto-ionics
Source: Royal Society of Chemistry journal article supplement (doi:10.1039/d2mh01087a), 2022-10-28
Supplement: d2mh01087a1.pdf [file d2mh01087a1.pdf]

## Electronic Supplementary Information (ESI) for:

### **Frequency-dependent stimulated and post-stimulated voltage control of magnetism in transition metal nitrides: towards brain-inspired magneto-ionics**

Zhengwei Tan<sup>a</sup>, Julius de Rojas<sup>a</sup>, Sofia Martins<sup>a</sup>, Aitor Lopeandia<sup>a,b</sup>, Alberto Quintana<sup>c</sup>, Matteo Cialone<sup>d</sup>, Javier Herrero-Martín<sup>e</sup>, Johan Meererschaut<sup>f</sup>, André Vantomme<sup>g</sup>, José L. Costa-Krämer<sup>h</sup>, Jordi Sort<sup>a,i,\*</sup> and Enric Menéndez<sup>a,\*</sup>

<sup>a</sup>Departament de Física, Universitat Autònoma de Barcelona, E-08193 Cerdanyola del Vallès, Spain.

<sup>b</sup>Catalan Institute of Nanoscience and Nanotechnology (ICN2), CSIC and BIST, Campus UAB, Cerdanyola del Vallès, E-08193 Barcelona, Spain.

<sup>c</sup>Institut de Ciència de Materials de Barcelona (ICMAB-CSIC), Campus UAB, Bellaterra, E-08193 Barcelona, Spain.

<sup>d</sup>CNR-SPIN Genova, Corso F. M. Perrone 24, 16152 Genova, Italy.

<sup>e</sup>ALBA Synchrotron Light Source, 08290 Cerdanyola del Vallès, Spain.

<sup>f</sup>IMEC, Kapeldreef 75, B-3001 Leuven, Belgium.

<sup>g</sup>Quantum Solid State Physics, KU Leuven, Celestijnenlaan 200 D, B-3001 Leuven, Belgium.

<sup>h</sup>IMN-Instituto de Micro y Nanotecnología (CNM-CSIC), Isaac Newton 8, PTM, 28760 Tres Cantos, Madrid, Spain.

<sup>i</sup>Institució Catalana de Recerca i Estudis Avançats (ICREA), Pg. Lluís Companys 23, E-08010 Barcelona, Spain.

\*Correspondence to: [jordi.sort@uab.cat](mailto:jordi.sort@uab.cat) (J. Sort), [enric.menendez@uab.cat](mailto:enric.menendez@uab.cat) (E. Menéndez)

### **Compositional and structural characterization**

High-angle annular dark-field scanning transmission electron microscopy (HAADF-STEM) and electron energy loss spectroscopy (EELS) were performed along the cross-sections of as-prepared 200 nm-thick CoN films and a 200 nm-thick CoN film electrolyte-gated at -25 V for 10 min. As shown in Fig. S1a and b, the as-prepared 200 nm-thick CoN films show a highly nanostructured morphology with homogeneous composition. As shown in Fig. S1b, upon gating at -25 V for 10 min, a well-defined interface between a N-free and highly porous Co top layer and the rest of unaltered CoN film can be observed both in the HAADF-STEM image and the EELS mappings, evidencing the existence of a planar N migration front in agreement with previous results<sup>11</sup>.

As seen in Fig. S2, the  $\theta/2\theta$  X-ray diffraction (XRD) pattern of an as-prepared 200 nm-thick CoN film reveals the presence of the (111) peak of CoN, indicating the growth of a textured phase. Upon subjecting a 200 nm-thick CoN film at -25 V for 15 min, the intensity of the (111) peak of CoN significantly decreases, in agreement with the denitriding caused but the transport of N ions towards the electrolyte.

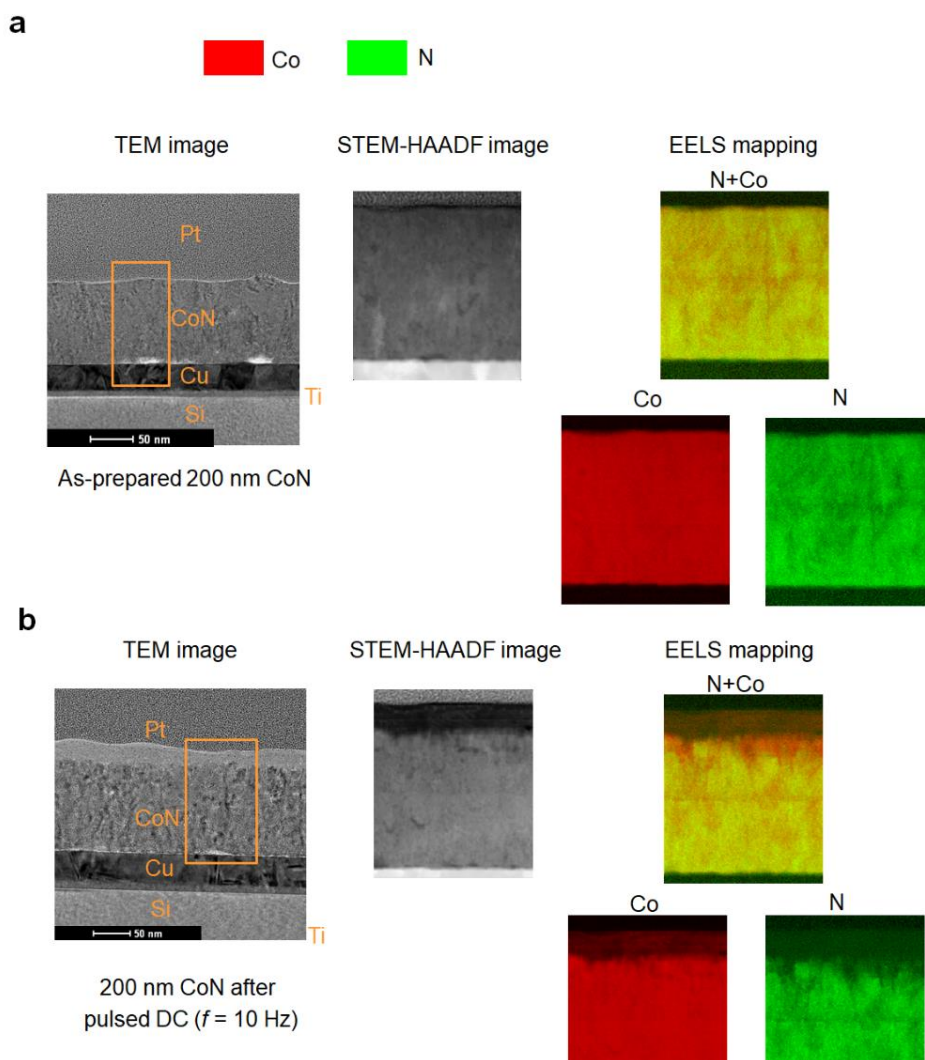

**Fig. S1.** Compositional characterization by high-angle annular dark-field scanning transmission electron microscopy (HAADF-STEM) and electron energy loss spectroscopy (EELS), and structural characterization by transmission electron microscopy (TEM). (a) TEM image of an as-prepared 200 nm-thick CoN film together with the HAADF-STEM image and corresponding Co and N EELS mappings of the area marked with a rectangle. (b) TEM image of a 200 nm-thick CoN film subjected to a -25 V for 600 s together with the HAADF-STEM image and corresponding Co and N EELS mappings of the area marked with a rectangle.

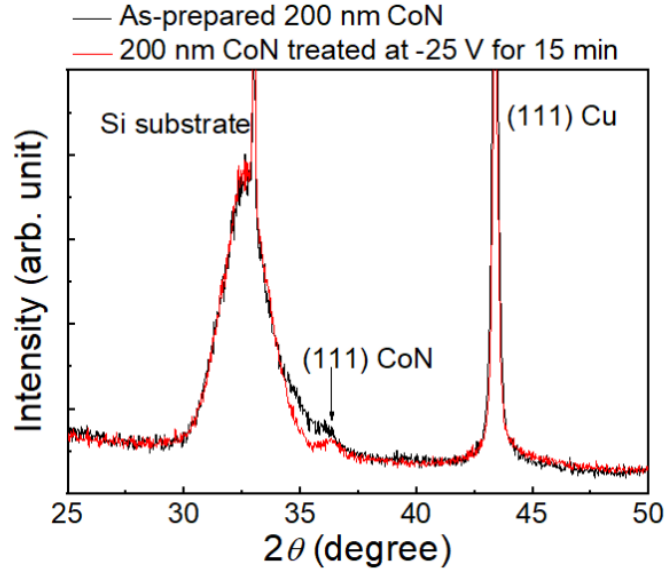

**Fig. S2.** Structural characterization by X-ray diffraction (XRD).  $\theta/2\theta$  XRD diffraction patterns of an as-prepared 200 nm-thick CoN film and a 200 nm-thick CoN film after being treated at -25V for 15 min. For phase identification, the cards no. ICDD JCPDF 00-001-1241 and ICDD JCPDF 00-016-0116, were used for Cu and CoN, respectively.

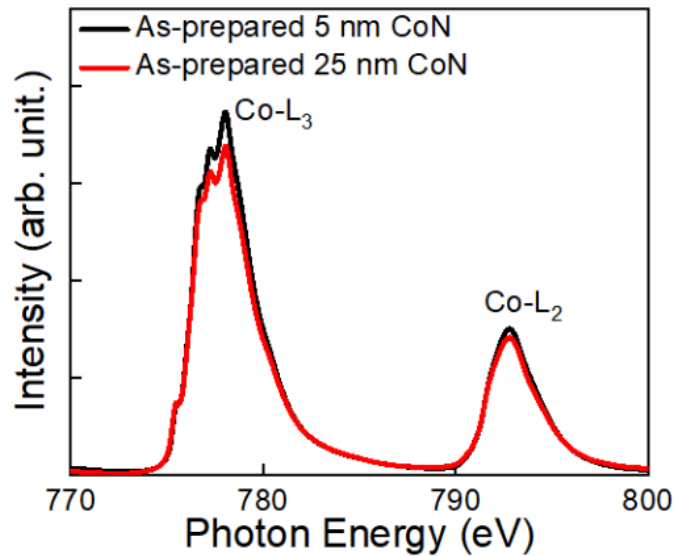

**Fig. S3.** Compositional characterization by X-ray absorption spectroscopy. Co L<sub>2,3</sub>-edge X-ray absorption spectroscopy measurements of the 5 nm- and 25 nm-thick CoN films.

### Magneto-ionic characterization

Fig. S4 shows the hysteresis loops of CoN films with thickness ranging from 5 to 200 nm, sequentially recorded while electrolyte-gated at  $-25$  V until reaching a stable state. The as-prepared CoN-based heterostructures exhibit some traces of ferromagnetic signal ( $< 10 \text{ emu cm}^{-3}$ ), which could be ascribed to local deviations of CoN stoichiometry at the Cu-CoN interface.

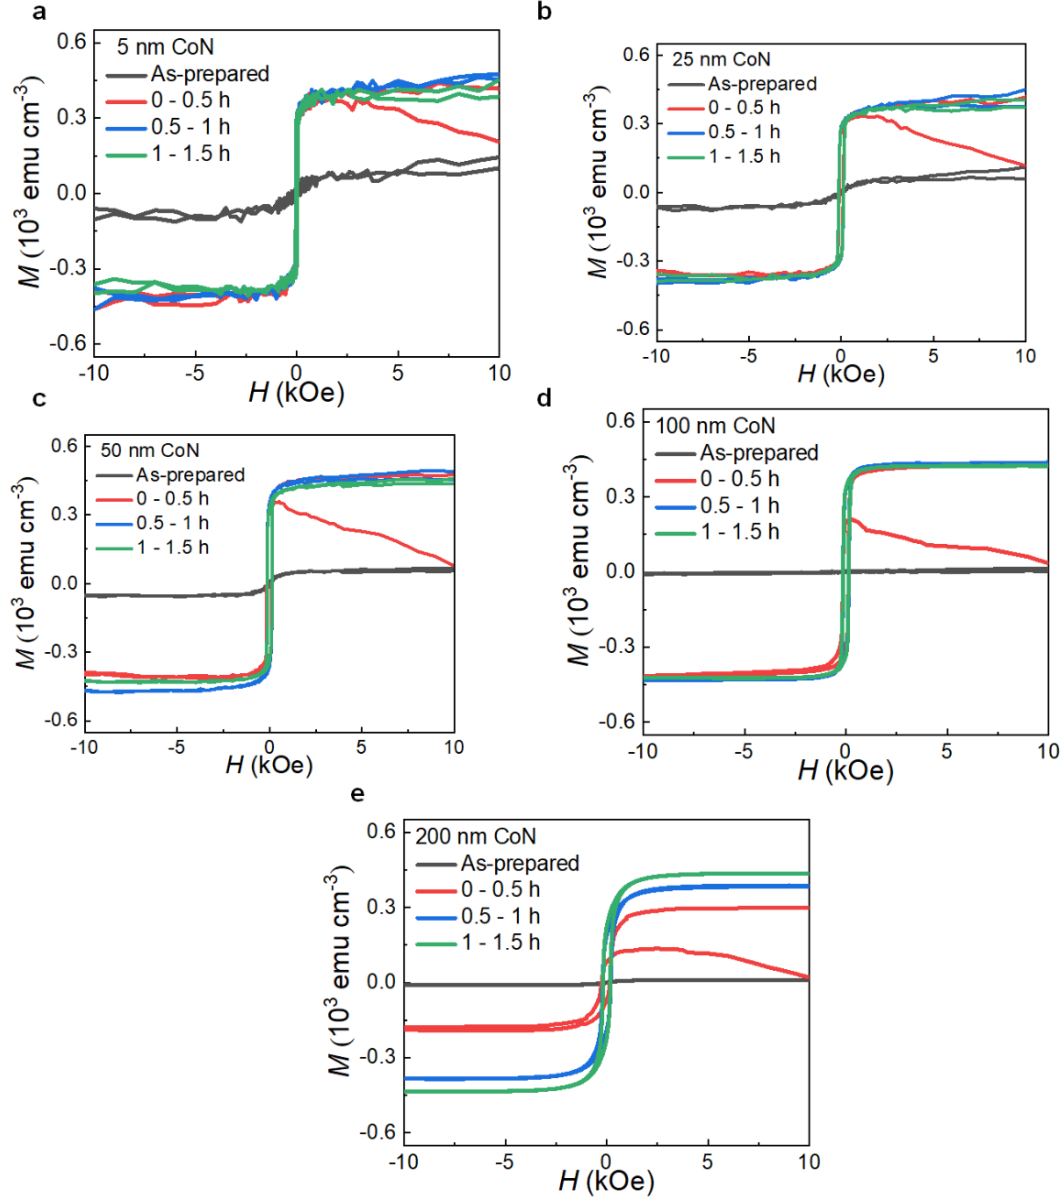

**Fig. S4.** Consecutive in-plane VSM hysteresis loops (each lasting 30 min) of the as-prepared film (black) and the films biased under  $-25$  V: **a**, 5 nm, **b**, 25 nm, **c**, 50 nm, **d**, 100 nm, and **e**, 200 nm CoN films.

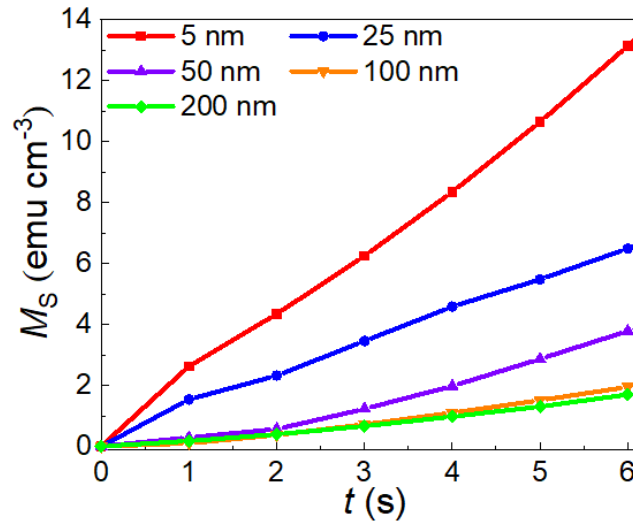

**Fig. S5.** Zoom of Fig. 1c in initial stages to highlight the generation of magnetization. Saturation magnetization ( $M_s$ ) as a function of time  $t$  from 0 to 6 s for a CoN films with thickness ranging from 5 to 200 nm under electrolyte-gating at -25 V while applying an external in-plane magnetic field of 10 kOe.

**Table S1.** Thickness-dependent magnetic and magnetoelectric parameters obtained from the consecutive hysteresis loops presented in Fig. S4 and  $M_s$  vs.  $t$  plots of Fig. S5.

| Thickness<br>(nm) | $\Delta M$ ( $H = 10$<br>kOe)<br>(emu cm <sup>-3</sup> )<br>upon -25 V for<br>1 s | $\Delta M$ ( $H = 10$ kOe)<br>(10 <sup>3</sup> emu cm <sup>-3</sup> )<br>upon -25 V for 50 s | $\Delta M$ ( $H = 10$ kOe)<br>(10 <sup>3</sup> emu cm <sup>-3</sup> )<br>upon saturation<br>[minimum time<br>required to reach a<br>stable $M_s$ ] | $H_c$<br>(Oe) |
|-------------------|-----------------------------------------------------------------------------------|----------------------------------------------------------------------------------------------|----------------------------------------------------------------------------------------------------------------------------------------------------|---------------|
| 5                 | 2.6                                                                               | 0.235                                                                                        | 0.297 [60 s]                                                                                                                                       | 35            |
| 25                | 1.5                                                                               | 0.132                                                                                        | 0.305 [130 s]                                                                                                                                      | 132           |
| 50                | 0.3                                                                               | 0.068                                                                                        | 0.379 [< 1 h]                                                                                                                                      | 132           |
| 100               | 0.1                                                                               | 0.040                                                                                        | 0.423 [< 1 h]                                                                                                                                      | 143           |
| 200               | 0.1                                                                               | 0.037                                                                                        | 0.507 [12 h]                                                                                                                                       | 179           |

**Table S2.**  $M_S$  attained once magneto-ionic process saturates (*i.e.*, maximum value), normalized by the time required to reach it ( $\Delta t$ ) and by the absolute value of the applied voltage ( $|\Delta V|$ ), from the current results and previous related works from the literature<sup>3,11-14,17</sup>

| Film                                                                                  | 85 nm-thick Co <sub>3</sub> O <sub>4</sub> film | 85 nm-thick CoN film | 85 nm-thick FeN film | 5 nm-thick Co <sub>3</sub> O <sub>4</sub> film | 30 nm-thick CoMnN film | 5 nm-thick CoN film (current work) |
|---------------------------------------------------------------------------------------|-------------------------------------------------|----------------------|----------------------|------------------------------------------------|------------------------|------------------------------------|
| $M_S/(\Delta t \Delta V )$<br>(emu cm <sup>-3</sup> h <sup>-1</sup> V <sup>-1</sup> ) | 7.8                                             | 52.0                 | 7.2                  | 32.0                                           | 64.5                   | 432.0                              |

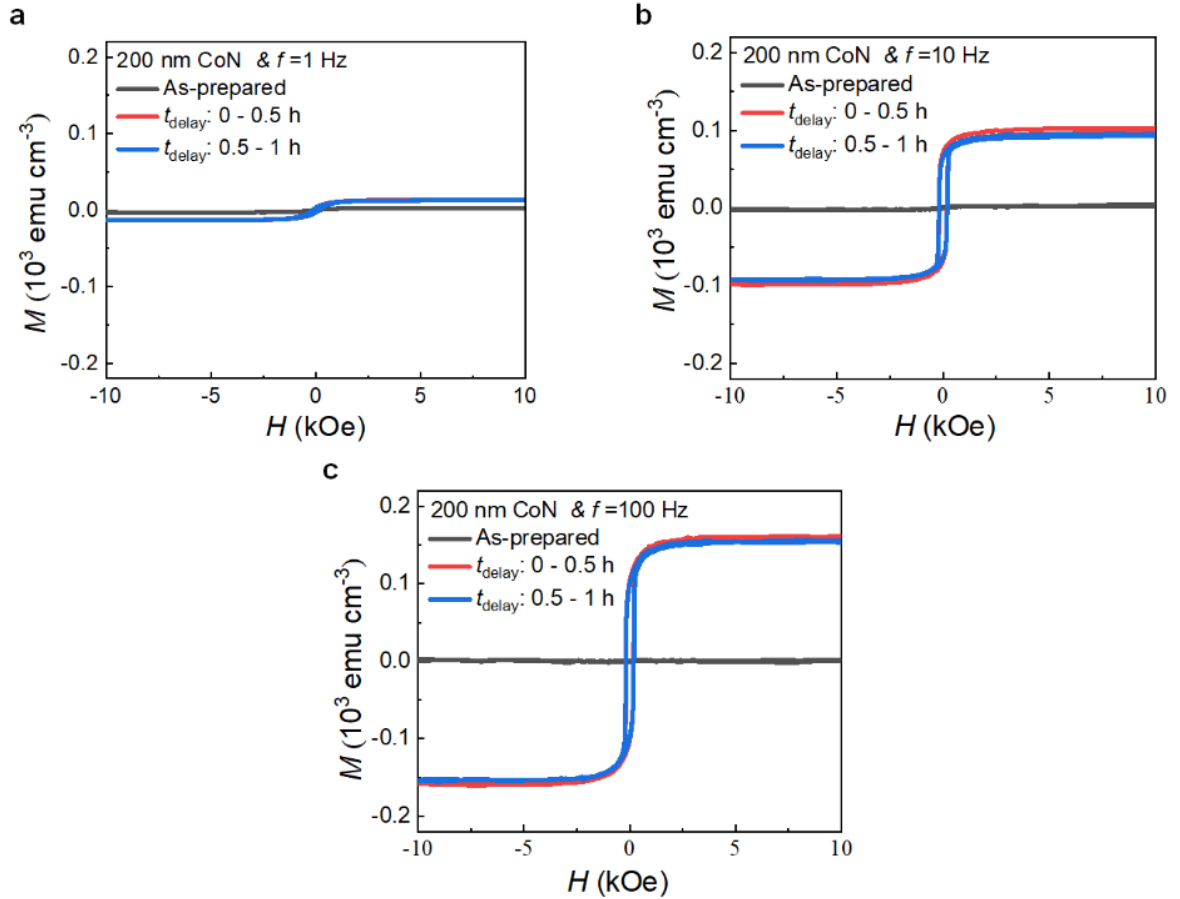

**Fig. S6.** In-plane vibrating sample magnetometry hysteresis loops (each lasting 30 min) of an as-prepared 200 nm CoN thin film and a 200 nm CoN film subjected to pulsed DC voltage

actuation for 0.5 and 1h at a frequency of (a) 1 Hz, (b) 10 Hz and (c) 100 Hz. Note that  $t_{\text{delay}}$  refers to the time after the voltage has been switched off.

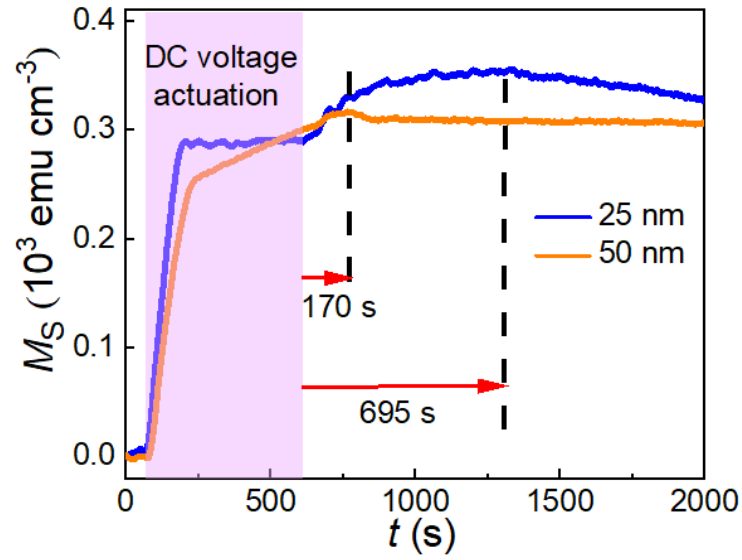

**Fig. S7.** Time evolution of the saturation magnetization ( $M_S$  vs.  $t$ ) during and after DC voltage actuation at -25V for 20 nm and 50 nm thick CoN films. Dashed lines mark the start of magnetization turning point.
